# Supplementary material for: From cup to clock: exploring coffee's role in slowing down biological aging
Source: Royal Society of Chemistry journal article supplement (doi:10.1039/d3fo04177h), 2024-01-01
Supplement: d3fo04177h1.pdf [file d3fo04177h1.pdf]

## Supplementary Material

### Supplementary Figure

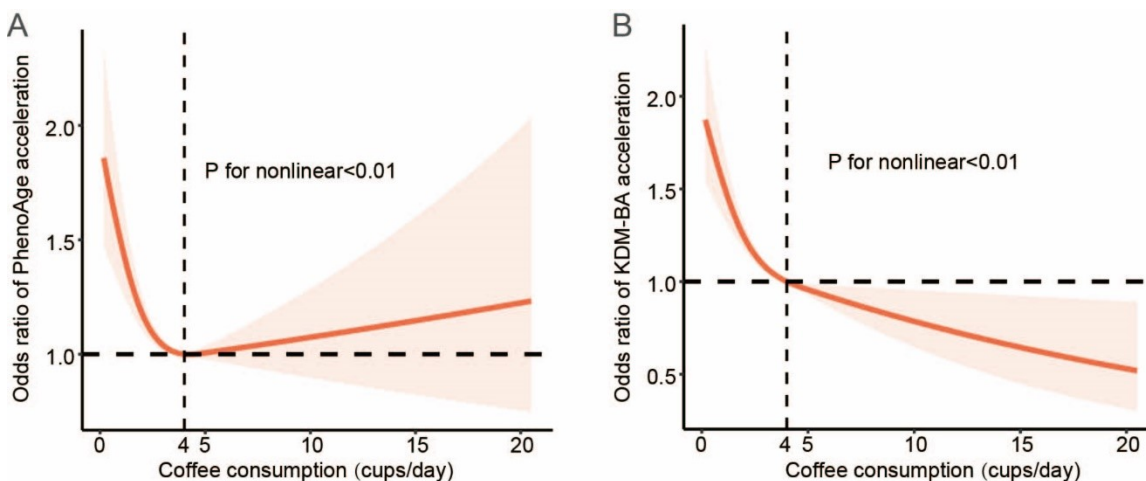

**Figure S1. The nonlinear associations between coffee consumption and odds ratio of PhenoAge (A) and KDM-BA acceleration (B)**

### Supplementary Tables

**TableS1. Logistic regression analysis of the association between coffee consumption and odds ratio of accelerated aging.**

|                  | None      | Coffee consumption (cup/day) |                 |                 | P for trend |
|------------------|-----------|------------------------------|-----------------|-----------------|-------------|
|                  |           | ≤1 cup                       | 1-3 cups        | ≥3 cups         |             |
| <b>PhenoAge</b>  |           |                              |                 |                 |             |
| <b>Model I</b>   | Reference | 0.96(0.83,1.12)              | 0.63(0.56,0.72) | 0.83(0.69,0.99) | <0.01       |
| <b>OR(95%CI)</b> |           |                              |                 |                 |             |
| <b>Model II</b>  | Reference | 1.01(0.85,1.20)              | 0.65(0.56,0.74) | 0.78(0.65,0.95) | <0.01       |
| <b>OR(95%CI)</b> |           |                              |                 |                 |             |
| <b>Model III</b> | Reference | 1.07(0.89,1.29)              | 0.66(0.56,0.77) | 0.67(0.54,0.82) | <0.01       |
| <b>OR(95%CI)</b> |           |                              |                 |                 |             |
| <b>KDM-BA</b>    |           |                              |                 |                 |             |
| <b>Model I</b>   | Reference | 1.03(0.87,1.21)              | 0.66(0.59,0.75) | 0.49(0.41,0.58) | <0.01       |
| <b>OR(95%CI)</b> |           |                              |                 |                 |             |
| <b>Model II</b>  | Reference | 1.09(0.92,1.29)              | 0.84(0.74,0.94) | 0.70(0.60,0.83) | <0.01       |
| <b>OR(95%CI)</b> |           |                              |                 |                 |             |
| <b>Model III</b> | Reference | 1.14(0.96,1.36)              | 0.86(0.77,0.97) | 0.67(0.57,0.79) | <0.01       |
| <b>OR(95%CI)</b> |           |                              |                 |                 |             |

Model I: non-adjusted model; Model II: adjusted for age gender, ethnicity, marital status, family income-to-poverty ratio and education level; Model III: adjusted for covariates of model 2, and smoking status, drinking status, body mass index, total energy intake, physical activity, the Healthy Eating Index 2015, trouble sleeping and general health. **Abbreviations:** OR=odds ratio; CI = confidence interval;

**Table S2. Regression analysis of the association between caffeinated or decaffeinated coffee and accelerated aging.**

| Types of coffee      | Coffee consumption (cup/day) |                    |                    | P for trend |
|----------------------|------------------------------|--------------------|--------------------|-------------|
|                      | ≤1 cup                       | 1-3 cups           | ≥3 cups            |             |
| <b>Caffeinated</b>   |                              |                    |                    |             |
| <b>PhenoAge</b>      |                              |                    |                    |             |
| <b>β(95%CI)</b>      | -0.05(-0.10, 0.01)           | -0.12(-0.17,-0.07) | -0.15(-0.21,-0.09) | <0.01       |
| <b>OR(95%CI)</b>     | 0.97(0.82,1.15)              | 0.66(0.56,0.77)    | 0.68(0.55,0.84)    | <0.01       |
| <b>KDM-BA</b>        |                              |                    |                    |             |
| <b>β(95%CI)</b>      | -0.01(-0.06, 0.05)           | -0.04(-0.09, 0.02) | -0.13(-0.19,-0.07) | <0.01       |
| <b>OR(95%CI)</b>     | 1.04(0.90,1.20)              | 0.88(0.78,1.00)    | 0.67(0.57,0.80)    | <0.01       |
| <b>Decaffeinated</b> |                              |                    |                    |             |
| <b>PhenoAge</b>      |                              |                    |                    |             |
| <b>β(95%CI)</b>      | -0.11(-0.16,-0.07)           | -0.11(-0.23, 0.01) | -0.27(-0.44,-0.09) | <0.01       |
| <b>OR(95%CI)</b>     | 0.73(0.63,0.83)              | 0.72(0.46,1.14)    | 0.57(0.33,0.98)    | <0.01       |
| <b>KDM-BA</b>        |                              |                    |                    |             |
| <b>β(95%CI)</b>      | -0.05(-0.10,-0.01)           | -0.13(-0.25, 0.00) | -0.19(-0.38,-0.01) | 0.01        |
| <b>OR(95%CI)</b>     | 0.85(0.77,0.94)              | 0.79(0.53,1.18)    | 0.65(0.37,0.93)    | <0.01       |

β based on linear regression model of biological aging; OR based on logistic regression model of biological aging. All analysis adjusted for age, gender, ethnicity, marital status, family income-to-poverty ratio and education level, smoking status, drinking status, body mass index, total energy intake, physical activity, the Healthy Eating Index 2015, trouble sleeping and general health. **Abbreviations:** OR=odds ratio; CI = confidence interval;

**Table S3. Multivariate regression analysis of the association between coffee consumption and KDM-BA accelerated aging stratified by age, gender, BMI and physical activity.**

| Characteristics           | β (95%CI)          | P value | OR (95%CI)      | P value |
|---------------------------|--------------------|---------|-----------------|---------|
| <b>Age</b>                |                    |         |                 |         |
| <b>≤50 years</b>          |                    |         |                 |         |
| ≤1 cup                    | 0.03(-0.04, 0.10)  | 0.42    | 1.14(0.96,1.36) | 0.12    |
| 1-3 cups                  | -0.05(-0.12, 0.01) | 0.13    | 0.86(0.77,0.97) | 0.02    |
| ≥3 cups                   | -0.11(-0.18,-0.04) | <0.01   | 0.67(0.57,0.79) | <0.01   |
| <b>&gt;50 years</b>       |                    |         |                 |         |
| ≤1 cup                    | 0.04(-0.07, 0.15)  | 0.43    | 1.14(0.96,1.36) | 0.12    |
| 1-3 cups                  | -0.04(-0.13, 0.05) | 0.33    | 0.86(0.77,0.97) | 0.02    |
| ≥3 cups                   | -0.12(-0.20,-0.04) | <0.01   | 0.67(0.57,0.79) | <0.01   |
| <b>Gender</b>             |                    |         |                 |         |
| <b>Male</b>               |                    |         |                 |         |
| ≤1 cup                    | 0.1( 0, 0.20)      | 0.05    | 1.17(0.89,1.54) | 0.24    |
| 1-3 cups                  | -0.03(-0.11, 0.04) | 0.35    | 0.89(0.74,1.08) | 0.23    |
| ≥3 cups                   | -0.12(-0.21,-0.04) | 0.01    | 0.66(0.57,0.88) | 0.01    |
| <b>Female</b>             |                    |         |                 |         |
| ≤1 cup                    | -0.01(-0.08, 0.06) | 0.79    | 1.10(0.90,1.34) | 0.35    |
| 1-3 cups                  | -0.05(-0.12, 0.02) | 0.15    | 0.85(0.71,1.03) | 0.1     |
| ≥3 cups                   | -0.15(-0.23,-0.08) | <0.01   | 0.66(0.51,0.86) | <0.01   |
| <b>BMI</b>                |                    |         |                 |         |
| <b>Normal weight</b>      |                    |         |                 |         |
| ≤1 cup                    | 0.02(-0.08, 0.13)  | 0.67    | 0.95(0.63,1.43) | 0.80    |
| 1-3 cups                  | -0.03(-0.10, 0.04) | 0.43    | 0.77(0.60,0.99) | 0.04    |
| ≥3 cups                   | -0.16(-0.28,-0.05) | 0.01    | 0.58(0.38,0.87) | 0.01    |
| <b>Overweight/Obesity</b> |                    |         |                 |         |
| ≤1 cup                    | 0.04(-0.03, 0.12)  | 0.26    | 1.20(0.96,1.49) | 0.10    |

|                              |                    |       |                 |       |
|------------------------------|--------------------|-------|-----------------|-------|
| 1-3 cups                     | -0.07(-0.13,-0.01) | 0.03  | 0.88(0.76,1.02) | 0.08  |
| ≥3 cups                      | -0.14(-0.20,-0.07) | <0.01 | 0.69(0.57,0.83) | <0.01 |
| <b>Physical activity</b>     |                    |       |                 |       |
| <b>Inactive/Insufficient</b> |                    |       |                 |       |
| ≤1 cup                       | 0.06(-0.13, 0.25)  | 0.53  | 1.09(0.66,1.79) | 0.73  |
| 1-3 cups                     | -0.08(-0.21, 0.05) | 0.20  | 0.87(0.59,1.28) | 0.46  |
| ≥3 cups                      | -0.02(-0.19, 0.15) | 0.79  | 0.89(0.54,1.47) | 0.64  |
| <b>Active</b>                |                    |       |                 |       |
| ≤1 cup                       | 0.01(-0.07, 0.09)  | 0.82  | 1.09(0.84,1.40) | 0.50  |
| 1-3 cups                     | -0.05(-0.11, 0.02) | 0.15  | 0.85(0.73,0.99) | 0.04  |
| ≥3 cups                      | -0.14(-0.21,-0.07) | <0.01 | 0.67(0.55,0.82) | <0.01 |

β based on linear regression model of KDM-BA aging; OR based on logistic regression model of KDM-BA aging. All analysis adjusted for age, gender, ethnicity, marital status, family income-to-poverty ratio and education level, smoking status, drinking status, body mass index, total energy intake, physical activity, the Healthy Eating Index 2015, trouble sleeping and general health.

**Abbreviations:** OR=odds ratio; CI = confidence interval;
